# Supplementary material for: Production of high-concentration n-caproic acid from lactate through fermentation using a newly isolated Ruminococcaceae bacterium CPB6
Source: Springer Nature journal article supplement (doi:10.1186/s13068-017-0788-y), 2017-04-21
Supplement: 13068_2017_788_MOESM1_ESM.pdf [file 13068_2017_788_MOESM1_ESM.pdf]

## **Additional file 1**

### **1. MATERIALS AND METHODS**

**1.1 16S rRNA Sequencing.** Genomic DNA was extracted using the TIANamp Bacteria DNA kit (TIANGEN Biotech, China). 16S rRNA sequences were amplified with a universal primer set, 27f (AGAGTTTGATCMTGGCTCAG) and 1492r (ACGGCTACCTTGTTACGACTT). PCR amplification system (50  $\mu$ l) includes: buffer (10 $\times$ ) 5  $\mu$ l, MgCl<sub>2</sub> (25 mM) 4  $\mu$ l, dNTP (10 mM) 1  $\mu$ l, primer 27f (10  $\mu$ M) 1  $\mu$ l, primer 1492r (10  $\mu$ M) 1  $\mu$ l, Taq enzyme (5 U/ $\mu$ l) 0.5  $\mu$ l, template DNA 1.0  $\mu$ l, and sterile water 36.5 $\mu$ l. PCR amplification was performed following the program as below: pre-denaturation at 94 °C for 5 min; then 30 cycles were performed with denaturation at 94 °C for 1 min, annealing at 55 °C for 1 min, 72 °C extension for 2 min; a final extension at 72 °C was performed for 10 min. The PCR product was purified using the TIANgel Midi Purification kit (TIANGEN Biotech, China), cloned to the pM18-T (TaKaRa) and sequenced using an automated DNA sequencer (model ABI3730; Applied BioSystems). Similarity of the 16S rRNA sequences from the isolates to those from other isolated organisms was compared using the Ezbiocloud (<http://www.ezbiocloud.net/>), GenBank, and RDP (<http://rdp.cme.msu.edu/>), respectively.

**1.2 Scanning Electron Microscopy (SEM).** The culture of strain CPB6 was centrifuged at 1000 rpm for 5 min, and the pellet was washed 3 times with 0.1 M phosphate buffer (pH 7.4), and fixed in 0.1 M phosphate buffer (pH 7.4) containing 2.5% glutaraldehyde at 4 °C for 4 h. After rinsing twice with 0.1 M phosphate buffer

(pH 7.4), the samples were dehydrated in ethanol serials (50%, 70%, 80%, 90%, and 100%, 15 min per step), and then dried in air. Finally, the images were obtained using the FEI Quanta 200 SEM at 20 kV.
